# Supplementary material for: Spindle-like MIL101(Fe) decorated with Bi2O3 nanoparticles for enhanced degradation of chlortetracycline under visible-light irradiation
Source: publisher site journal article supplement (doi:10.3762/bjnano.13.91), 2022-09-28
Supplement: Additional file 1 [file 2190-4286-13-91-S1.pdf]

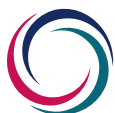

## Supporting Information

for

### **Spindle-like MIL101(Fe) decorated with Bi<sub>2</sub>O<sub>3</sub> nanoparticles for enhanced degradation of chlortetracycline under visible-light irradiation**

Chen-chen Hao, Fang-yan Chen, Kun Bian, Yu-bin Tang and Wei-long Shi

*Beilstein J. Nanotechnol.* **2022**, *13*, 1038–1050. [doi:10.3762/bjnano.13.91](https://doi.org/10.3762/bjnano.13.91)

## Additional figures and tables

**Table S1:** BET surface area, pore volume, and pore size of Bi<sub>2</sub>O<sub>3</sub>, MIL101(Fe), and BOM-20.

| Samples                        | $S_{\text{BET}}$ (m <sup>2</sup> /g) | $V_p$ (cm <sup>3</sup> /g) | Pore size (Å) |
|--------------------------------|--------------------------------------|----------------------------|---------------|
| MIL101(Fe)                     | 276.35                               | 0.42                       | 25.64         |
| Bi <sub>2</sub> O <sub>3</sub> | 6.19                                 | 0.01                       | 62.6          |
| BOM-20                         | 60.23                                | 0.12                       | 47.8          |

**Table S2:** Comparison of photocatalytic efficiencies of other previously reported photocatalysts for degradation of CTC in recent years.

| Photocatalysts                                                                                                | Dosage of catalyst (g/L) | CTC concentration (mg/L) | Reaction time (min) | Degradation rate (%) | Ref.             |
|---------------------------------------------------------------------------------------------------------------|--------------------------|--------------------------|---------------------|----------------------|------------------|
| Ce-MOF/GO/Fe <sub>3</sub> O <sub>4</sub>                                                                      | 0.45                     | 20                       | 180                 | 80.5                 | [S1]             |
| Zn <sub>0.75</sub> Mn <sub>0.75</sub> Fe <sub>1.5</sub> O <sub>4</sub> /ZnFe <sub>2</sub> O <sub>4</sub> /ZnO | 0.4                      | 10                       | 120                 | 61.9                 | [S2]             |
| CNPs                                                                                                          | 0.1                      | 10                       | 120                 | 82.2                 | [S3]             |
| 3Co/0.3ZnIn <sub>2</sub> S <sub>4</sub> /GaN                                                                  | 0.4                      | 10                       | 120                 | 81.0                 | [S4]             |
| Bi <sub>1.81</sub> MnNbO <sub>6.72</sub> /sulfite                                                             | 0.3                      | 20                       | 120                 | 76.2                 | [S5]             |
| Co <sub>2</sub> SnO <sub>4</sub> -SnO <sub>2</sub> /GC                                                        | 0.4                      | 10                       | 80                  | 83.0                 | [S6]             |
| BP-BiVO <sub>4</sub>                                                                                          | 0.15                     | 10                       | 120                 | 88.0                 | [S7]             |
| <b>BOM-20</b>                                                                                                 | <b>0.3</b>               | <b>20</b>                | <b>120</b>          | <b>88.2%</b>         | <b>this work</b> |

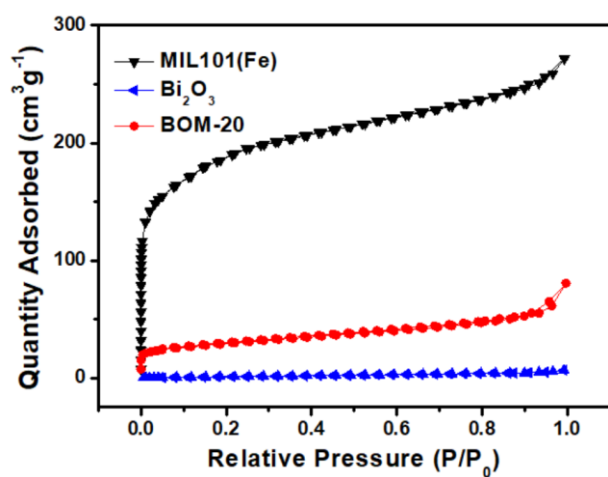

Figure S1: N<sub>2</sub> adsorption–desorption isotherms.

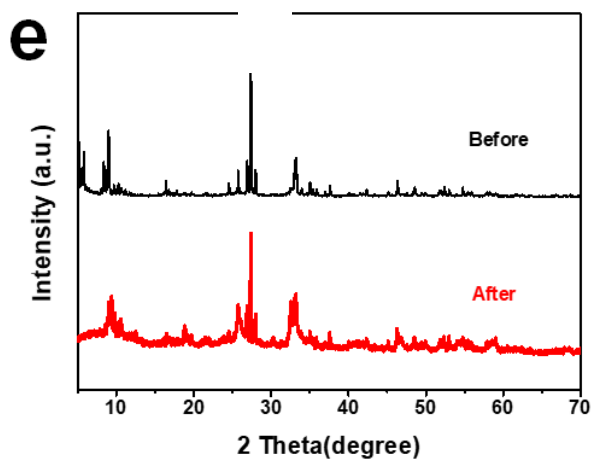

Figure S2: XRD patterns of the BOM-20 before and after the cyclic test.

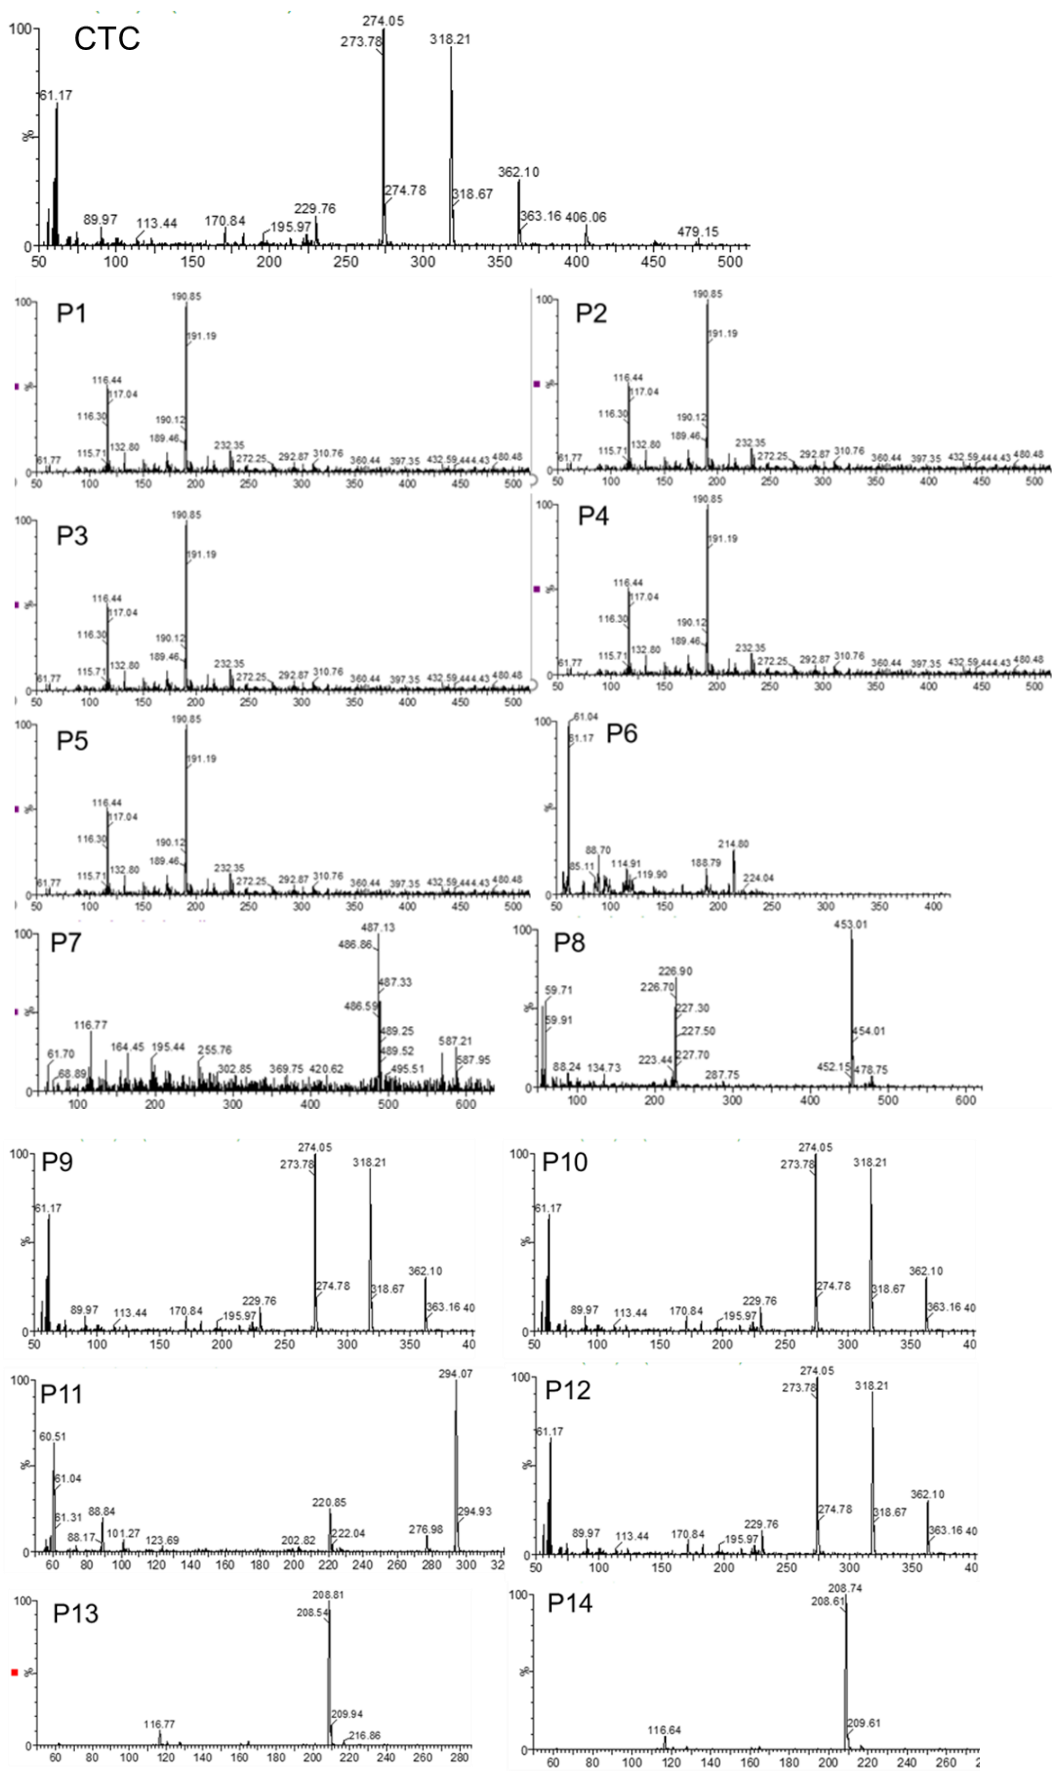

Figure S3: Liquid chromatography–mass spectroscopy results of TCT and intermediates.

## References

- [S1] Y. Bai, M. Han, X. Li, S. Feng, L. Lu, S. Ma, Facile and efficient photocatalyst for degradation of chlortetracycline promoted by H<sub>2</sub>O<sub>2</sub>. *Inorg. Chem. Front.* **2022**, 9, 2952-2963.
- [S2] Fu, J., Yu, X., Li, Z. et al. Study on the degradation of chlortetracycline hydrochloride in mariculture wastewater by Zn<sub>0.75</sub>Mn<sub>0.75</sub>Fe<sub>1.5</sub>O<sub>4</sub>/ZnFe<sub>2</sub>O<sub>4</sub>/ZnO photocatalyst. *Water Air Soil Pollut.* **2021**, 232, 12.
- [S3] X. Liu, W. Hou, Y. Huang, H. Zhao, Z. Song, Y. Huang, Facile and green synthesis of carbon nanopinnacles for the removal of chlortetracycline: Performance, mechanism and biotoxicity. *Chem. Eng. J.*, **2022**, 433, 133822.
- [S4] Y. He, J. Shi, Q. Yang, Y. Tong, Z. Ma, L. B. Junior, B. Yao, Co-doped 3D petal-like ZnIn<sub>2</sub>S<sub>4</sub>/GaN heterostructures for efficient removal of chlortetracycline residue from real pharmaceutical wastewater. *Chem. Eng. J.*, **2022**, 446, 137355.
- [S5] J. Zhao, Q. Song, Q. He, D. D. Dionysiou, F. Wu, Y. Feng, X. Zhang. Fabrication of Bi<sub>1.81</sub>MnNbO<sub>6.72</sub>/sulfite system for efficient degradation of chlortetracycline. *Chemosphere.* **2021**, 268, 129269.
- [S6] J. Zheng, L. Zhang, Rational design and fabrication of multifunctional catalyzer Co<sub>2</sub>SnO<sub>4</sub>-SnO<sub>2</sub>/GC for catalysis applications: photocatalytic degradation/catalytic reduction of organic pollutants. *Appl. Catal. B: Environ.*, **2018**, 231, 34-42.
- [S7] M. Zhang, Q. Shi, X. Cheng, et al., Accelerated generation of hydroxyl radical through surface polarization on BiVO<sub>4</sub> microtubes for efficient chlortetracycline degradation. *Chem. Eng. J.*, **2020**, 400, 125871.
